# Supplementary material
Source: PubMed Central journal article supplement (PMC5537727)
Supplement: NIHMS877060-supplement-supplement_1.pdf [file NIHMS877060-supplement-supplement_1.pdf]

## A BAG3 Coding Variant in Mice Determines Susceptibility to Ischemic Limb Muscle Myopathy by Directing Autophagy

Joseph M. McClung, Timothy J. McCord, Terence E. Ryan, Cameron A. Schmidt, Thomas D. Green,  
Kevin W. Southerland, Jessica L. Reinardy, Sarah B. Mueller, Talaignair N. Venkatraman,  
Christopher D. Lascola, Sehoon Keum, Douglas A. Marchuk, Espen E. Spangenburg, Ayotunde O.  
Dokun, Brian H. Annex and Christopher D. Kontos

*Circulation*. published online April 25, 2017;

*Circulation* is published by the American Heart Association, 7272 Greenville Avenue, Dallas, TX 75231

Copyright © 2017 American Heart Association, Inc. All rights reserved.

Print ISSN: 0009-7322. Online ISSN: 1524-4539

The online version of this article, along with updated information and services, is located on the  
World Wide Web at:

<http://circ.ahajournals.org/content/early/2017/04/25/CIRCULATIONAHA.116.024873>

Data Supplement (unedited) at:

<http://circ.ahajournals.org/content/suppl/2017/04/25/CIRCULATIONAHA.116.024873.DC1>

**Permissions:** Requests for permissions to reproduce figures, tables, or portions of articles originally published in *Circulation* can be obtained via RightsLink, a service of the Copyright Clearance Center, not the Editorial Office. Once the online version of the published article for which permission is being requested is located, click Request Permissions in the middle column of the Web page under Services. Further information about this process is available in the [Permissions and Rights Question and Answer](#) document.

**Reprints:** Information about reprints can be found online at:  
<http://www.lww.com/reprints>

**Subscriptions:** Information about subscribing to *Circulation* is online at:  
<http://circ.ahajournals.org/subscriptions/>

1 **A BAG3 Coding Variant in Mice Determines Susceptibility to Ischemic Limb Muscle**  
2 **Myopathy by Directing Autophagy**

3 ***SUPPLEMENTAL MATERIAL***

4  
5 Short Title: McClung, BAG3 variation determines ischemia susceptibility

6  
7 Joseph M. McClung<sup>1,2</sup># PhD, Timothy J. McCord<sup>3</sup> BS, Terence E. Ryan<sup>1,2</sup> PhD, Cameron A.  
8 Schmidt<sup>1,2</sup> BS, Tom D. Green<sup>1,2</sup> BS, Kevin W. Southerland<sup>4</sup> MD, Jessica L. Reinardy<sup>3,5</sup> PhD,  
9 Sarah B. Mueller<sup>3,5</sup> PhD, Talaighair N. Venkatraman<sup>6</sup> PhD, Christopher D. Lascola<sup>6</sup> MD, Sehoon  
10 Keum<sup>7</sup> PhD, Douglas A. Marchuk<sup>7</sup> PhD, Espen E. Spangenburg<sup>1,2</sup> PhD, Ayotunde Dokun<sup>8,10</sup> MD,  
11 Brian H. Annex<sup>8,9,10</sup> MD, Christopher D. Kontos<sup>3,5</sup> MD

12  
13 <sup>1</sup>Department of Physiology; <sup>2</sup>Diabetes and Obesity Institute, East Carolina University, Brody  
14 School of Medicine, Greenville, NC. <sup>3</sup>Department of Medicine, Division of Cardiology;  
15 <sup>4</sup>Department of Surgery, Division of General Surgery; <sup>5</sup>Department of Pharmacology and Cancer  
16 Biology; <sup>6</sup>Department of Radiology; <sup>7</sup>Department of Molecular Genetics and Microbiology; Duke  
17 University Medical Center, Durham, NC. <sup>8</sup>Department of Medicine, Division of Endocrinology;  
18 <sup>9</sup>Division of Cardiovascular Medicine; <sup>10</sup>The Robert M. Berne Cardiovascular Research Center;  
19 University of Virginia School of Medicine, Charlottesville, VA

20  
21 #Correspondence should be addressed to J.M.M.: 4109 East Carolina Heart Institute, Mail Stop  
22 743. 115 Heart Drive, Greenville, NC 27834; Tel: 252-737-5034; Fax: 252-744-0462; email:  
23 [mcclungj@ecu.edu](mailto:mcclungj@ecu.edu).

24

25

## 26 **Detailed Materials and Methods**

27 *Animals.* Experiments were conducted on adult C57BL/6 (BL6;  $N=34$ ), BALB/c ( $N=151$ ), or  
28 BALB/c congenic mice (Congenic, C.B6-*Lsq1-3* or also known as C.B6-*Civq1-3*<sup>1</sup>;  $N=5$ ) ( $\geq 10$   
29 weeks old), approved by either the East Carolina University, Duke University, or University of  
30 Virginia Animal Care and Use Committees and conformed to the Guide for the Care and Use of  
31 Laboratory Animals published by the US National Institutes of Health. Briefly, hindlimb  
32 ischemia<sup>2</sup> was performed by anesthetizing mice by intraperitoneal injection of ketamine (90  
33 mg/kg) and xylazine (10 mg/kg) and surgically inducing unilateral hindlimb ischemia with ligation  
34 and excision of the femoral artery from its origin just above the inguinal ligament to its  
35 bifurcation at the origin of the saphenous and popliteal arteries. The inferior epigastric, lateral  
36 circumflex, and superficial epigastric artery branches were also isolated and ligated. After  
37 induction of ischemia semiquantitative necrosis scoring and laser Doppler perfusion monitoring  
38 were performed as described below. Ischemia surgeries and necrosis scoring on virus-treated  
39 animals were performed in several cohorts of animals from 3 laboratories at 3 institutions by  
40 blinded investigators for effect validation. A subset of BL6 and BALB/c animals were subjected  
41 to a modified version of hindlimb ischemia as previously described<sup>3</sup>, where the femoral artery  
42 was singularly ligated and transected just inferior to the inguinal ligament and the inferior  
43 epigastric, lateral circumflex, and superficial epigastric artery collateral branches were left intact.  
44 The cardiotoxin (CTX) model of mouse muscle regeneration was performed as previously  
45 described<sup>4</sup> using 20  $\mu$  L I.M. injections of 5  $\mu$  M *Naja nigricollis* venom into the tibialis anterior  
46 (TA) muscle under anesthesia. An equivalent volume sham injection of 1 $\times$  phosphate buffered  
47 saline (PBS) was administered to the muscles of the contralateral hindlimb. The full breakdown  
48 of animal usage per experimental group (across all Institutions) is as follows: 1) parental BL6  
49 mice for HLI ( $N=24$ ); 2) BL6+AAV-BAG3<sup>Met81</sup> for HLI ( $N=5$ ); 3) Congenic mice for HLI ( $N=5$ ); 4)

50 BALB/c mice for HLI ( $N=15$ ); 5) BALB/c+AAV-GFP for HLI ( $N=30$ ); 6) BALB/c+AAV-BAG3<sup>Met81</sup>  
51 for HLI ( $N=21$ ); BALB/c+AAV-BAG3<sup>lle81</sup> for HLI ( $N=22$ ); 7) BALB/c+AAV-GFP for CTX ( $N=4$ ); 8)  
52 BALB/c+AAV-BAG3<sup>Met81</sup> for CTX ( $N=4$ ); 9) BALB/c+AAV-BAG3<sup>lle81</sup> for CTX ( $N=4$ ); 10) BL6 for  
53 modified HLI ( $N=5$ ); 11) BALB/c+AAV-GFP for modified HLI ( $N=5$ ); 12) BALB/c+AAV-BAG3<sup>Met81</sup>  
54 for modified HLI ( $N=12$ ); 13) BALB/c+AAV-BAG3<sup>lle81</sup> for modified HLI ( $N=10$ ); 14) BALB/c for cell  
55 isolations ( $N=24$ ).

56 *Assessment of tissue necrosis.* The extent of necrosis, if any, in ischemic limbs was recorded  
57 post-operatively using the previously described semi-quantitative scale<sup>2, 5</sup>: grade 0, no necrosis  
58 in ischemic limb; grade I, necrosis limited to toes; grade II, necrosis extending to dorsum pedis;  
59 grade III, necrosis extending to crus; and grade IV, necrosis extending to mid-tibia or complete  
60 limb necrosis. For limb necrosis, each animal was scored by a blinded investigator at each time  
61 point and all scores were assigned across each model by the same-blinded investigator.

62 *Laser Doppler perfusion imaging.* Limb blood flow was measured using laser Doppler perfusion  
63 imaging (LDPI) as previously described<sup>3</sup> with the following modifications. Imaging was  
64 performed at a 4ms/pixel scan rate on animals placed on a 37°C warming pad in the prone  
65 position under ketamine/xylazine anesthesia using a Moor Instruments LD12-High Resolution  
66 (830 nm) System (Moor, Axminster, UK). Hindlimb hair was removed with depilatory cream 24  
67 hours prior to initial scanning and hair was removed with a microshaver at all other timepoints.  
68 Images were analyzed with the MoorLDI Image Review software. Mice were closely monitored  
69 during the postoperative period and flow in the ischemic and contralateral non-ischemic limbs  
70 was measured immediately after surgery to verify successful surgery.

71 *Magnetic resonance (MR) imaging.* MR imaging was performed on a Bruker 7T (70/30) system  
72 (Bruker Biospin, Billerica, MA, USA) utilizing a quadrature surface receive and volume transmit  
73 coil set-up with active decoupling. Animals were anesthetized (induction: 5% isoflurane,  
74 maintenance 1.5% isoflurane, with room air mixture) and placed in an MRI-compatible cradle

75 equipped to maintain body temperature constant using warm water circulation. Temperature  
76 and respiratory rate were continuously monitored. T2-weighted anatomic images were first  
77 acquired using a RARE-based fast spin echo sequence with TR=4200, TE=12, RARE factor 8, 1  
78 mm slice thickness, FOV 2.4 cm, 256 x 256, with respiratory gating. T2 images are displayed as  
79 3D maximum intensity projection images for correlation to MR angiography (MRA). MRA was  
80 performed using a contrast-enhanced T1-weighted time-of-flight sequence in the coronal plane  
81 with 2D FLASH, using TE/TR + 3.8/15 ms, FOV = 4 cm x 4 cm, matrix of 256 x 256, and 120  
82 slices. Vascular contrast was enhanced utilizing intravenous gadofosveset trisodium  
83 (ABLAVAR, Lantheus Medical Imaging, Inc.), at 0.03 mmol/Kg. This agent is clinically approved  
84 for optimization of blood pool imaging by virtue of specific binding to serum albumin. Perfusion  
85 maps were then generated using a double spin-echo planar pulse sequence using pairs of  
86 bipolar gradients at specific predetermined signs in each of three orthogonal directions. The  
87 combination of gradient directions allows cancellation of all off-diagonal tensor elements,  
88 enabling measurement of the diffusion tensor trace, and therefore providing unambiguous and  
89 rotationally invariant ADC values. Four  $b$  values ( $b = 0, 50.0, 100, \text{ and } 200$ ) were acquired, with  
90 a matrix size of 128 x 128, slice thickness 1.0 mm. Volume images (one for each  $b$  value) were  
91 created from raw DICOM images. For voxels within the 128x128x15 matrix with a signal value  
92 above 2000, the apparent diffusion coefficient (ADC) at each voxel was calculated using an  
93 exponential moving fit by the following method:  $ADC = \ln [S(b=b_1) - S(b=b_2)]/b_2-b_1$ .  $B_1$  and  $b_2$   
94 values of 100 and 200, respectively, are sensitive to blood flow apparent diffusion changes in  
95 small arteries and capillaries. ADC maps were generated using mono-exponential fitting as  
96 above, and T2 images were zero-filled to 256x256 prior to analysis. Parametric images were  
97 analyzed in anatomic regions of interest (ROIs) using Bruker Paravision software and offline  
98 using Osirix software.

99 *Muscle contractile force measurements.* Contractile force measurements were performed using  
100 extensor digitorum longus (EDL) muscles as previously described<sup>6</sup>. In brief, single EDL muscles  
101 were surgically excised with ligatures at each tendon (5–0 silk suture) and mounted in a bath  
102 between a fixed post and a force transducer (Aurora 300B-LR) operated in isometric mode. The  
103 muscle was maintained in modified Krebs buffer solution (PSS; pH 7.2) containing 115 mM  
104 NaCl, 2.5 mM KCl, 1.8 mM CaCl<sub>2</sub>, 2.15 mM Na<sub>2</sub>HPO<sub>4</sub>, and 0.85 mM NaH<sub>2</sub>PO<sub>4</sub>, and maintained  
105 at 25°C under aeration with 95% O<sub>2</sub>–5% CO<sub>2</sub> throughout the experiment. Resting tension and  
106 muscle length were iteratively adjusted for each muscle to obtain the optimal twitch force, and a  
107 supramaximal stimulation current of 600mA was used for stimulation. After a 5 min equilibration,  
108 isometric tension was evaluated by 200 ms trains of pulses delivered at 10, 20, 40, 60, 80, 100,  
109 and 120 Hz. Length was determined with a digital microcaliper. After the experimental protocol,  
110 muscles were trimmed proximal to the suture connections, excess moisture was removed, and  
111 the muscle was weighed. The cross-sectional area for each muscle was determined by dividing  
112 the mass of the muscle (g) by the product of its length (L<sub>0</sub>, mm) and the density of muscle (1.06  
113 g/cm<sup>3</sup>) and was expressed as millimeters squared (mm<sup>2</sup>). Muscle output was then expressed as  
114 specific force (N/cm<sup>2</sup>) determined by dividing the tension (N) by the muscle cross-sectional  
115 area<sup>7</sup>.

116 *RNA Isolation and RT-PCR.* Total RNA was extracted using Trizol-phenol/chloroform isolation  
117 procedures and was reverse-transcribed using Superscript III Reverse Transcriptase and  
118 random primers (Invitrogen Inc.). Real-time PCR was performed using a 7500 Real-Time PCR  
119 System (Applied Biosystems, Foster City, CA). Relative quantification of *Bag3* mRNA levels was  
120 determined using the comparative threshold cycle ( $\Delta \Delta$ CT) method using FAM TaqMan® Gene  
121 Expression Assays (Applied Biosystems) specific to the given gene run in complex (multiplex)  
122 with a VIC-labeled GAPDH control primer.

123 *Primary Antibodies and Materials.* The following commercial antibodies were used: FLAG,  
124 LC3b, ATG7, Beclin, HspB8, SQSTM1/p62 (Cell Signaling), BAG3 (Polyclonal, Imgenex),  
125 GAPDH (Novus Biologicals), tubulin (Santa Cruz), CD31 (Abd Serotec MCA-1364), SMA  
126 (DAKO, 1A4). For immunofluorescence: Dystrophin (Thermo Scientific RB-9024), and Pax7,  
127 eMyHC (F1.652), and Dystrophin (MANDYS1 3B7) (all from Developmental Studies Hybridoma  
128 Bank, Iowa City, IA), CD31 (Abd Serotec MCA-1364), and SMA (DAKO, 1A4). The TSA  
129 amplification kit (#24, with HRP-streptavidin and Alexa Fluor 568 tyramide, Molecular Probes)  
130 was utilized exclusively for Pax7 immunofluorescence.

131 *Histological analysis.* Skeletal muscle morphology, vessel density, and markers of muscle  
132 regeneration were assessed by standard light microscopy and immunofluorescence microscopy  
133 as previously described<sup>3</sup>. Eight- $\mu$ m-thick transverse sections were cut from mouse TA muscle,  
134 frozen in liquid nitrogen-cooled isopentane in optimum cutting temperature (OCT) medium.  
135 Sections were allowed to come to room temperature and were either stained with hematoxylin  
136 and eosin using standard methods or fixed and permeabilized with ice-cold acetone for 10 min  
137 at 4°C. Sections from TA muscle samples were stained with H&E, and digital images were  
138 obtained at  $\times 10$  magnification for the analysis of non-contractile tissue expansion. A 528  
139 (22X24)-point grid was overlain on 3 images from each animal, and points were analyzed for  
140 occurrence on myofibers or outside of myofibers and expressed as the percentage of non-  
141 myofiber area in HLI muscle as an indication of muscle myofiber reformation and hypertrophy.  
142 For the analysis of myofiber integrity, approximately 300 individual fibers visualized by  
143 immunofluorescence labeling for dystrophin and DAPI were quantified for disrupted dystrophin  
144 staining ( $>50\%$  of fiber membrane area dystrophin negative) and expressed as the percentage  
145 of total fibers with intact dystrophin immunostaining (% intact TA myofibers). Total or eMyHC+  
146 myofiber cross sectional area (CSA,  $\mu\text{m}^2$ ) was determined using  $\times 10$  images by analyzing

147 approximately 300 individual fibers with NIH ImageJ image analysis software. Images were  
148 also utilized for the localization of centralized myofiber nuclei, expressed as a percentage of  
149 total myofibers with centralized nuclei.

150 *Immunofluorescence (IF)*. IF was used for the visualization of muscle morphology, vessel  
151 density, and muscle regeneration. 8- $\mu\text{m}$ -thick transverse sections were cut from TA muscle  
152 frozen in liquid nitrogen cooled isopentane in OCT. Sections were allowed to come to room  
153 temperature and fixed/permeabilized with ice-cold acetone for 10 min at 4°C. Fixed sections  
154 were rehydrated in 1 $\times$  PBS before blocking in 5% normal goat serum (Sigma) in 1 $\times$  PBS at RT  
155 for 45 min. Slides were then incubated overnight at 4°C in a primary antibody solution. Slides  
156 were then washed 3 $\times$  in 1 $\times$  PBS at RT and incubated for 1h at RT in the dark in a secondary  
157 solution containing a 1:250 dilution of Alexa Fluor 488-, 568-, or 633-conjugated secondary  
158 antibodies in blocking solution. Sections were then washed in the dark 3 $\times$  for 5 min each with 1 $\times$   
159 PBS at RT, and slipcovers were mounted using Vectashield HardSet Mounting Medium with  
160 DAPI (Vector Labs H-1500). Images were captured using a Zeiss Axio Observer Inverted Laser  
161 Scanning Microscope (LSM) 510 utilizing the Zeiss LSM 510 software (v. 4.2) and analyzed by a  
162 blinded investigator using ImageJ software (NIH, v. 1.49v). Vessel density was quantified as the  
163 number of CD31<sup>+</sup> cells per  $\mu\text{m}^2$  of muscle analyzed. The density of CD31<sup>+</sup> vessels was  
164 quantified as an indicator of capillary density changes in the distal limb muscle and represents  
165 capillary regression or angiogenesis. Pax7 staining was performed as previously described<sup>8</sup>.  
166 Sections were then washed 3 $\times$  for 5 min in the dark with 1 $\times$ PBS at RT and slipcovers were  
167 mounted using Vectashield HardSet Mounting Medium with DAPI (Vector Labs H-1500). Images  
168 were captured using a Zeiss Axio Observer Inverted Laser Scanning Microscope (LSM) 510  
169 utilizing the Zeiss LSM 510 version 4.2 software and analyzed using NIH ImageJ software as  
170 follows: CD31+, SMA+, PAX7+, and eMyHC+ labeled cells were counted and expressed as the



171 ratio of positively stained cells/  $\mu$  m<sup>2</sup> of TA muscle analyzed. Representative  
172 immunofluorescence images from animals infected with AAV-GFP viruses were pseudo-colored  
173 green for visualization.

174 *SDS-PAGE, western blotting (WB), and immunoprecipitation (IP).* SDS-PAGE and WB were  
175 performed according to standard methods. Frozen muscles were homogenized in ice-cold RIPA  
176 lysis buffer containing protease and phosphatase inhibitors. Protein concentrations were  
177 determined using a BCA protein assay (Pierce, ThermoFisher #23225). Proteins were then  
178 separated by SDS-PAGE (Mini-Protean TGX, Bio-Rad #4561093) with equal amounts of total  
179 protein loaded per well. For IP, total protein lysates from limb tissues or cell lysates were  
180 generated in lysis buffer supplemented with protease and phosphatase inhibitor tablets  
181 (Complete PI, PhosSTOP, Roche USA) and allowed to rotate with monoclonal Anti-FLAG  
182 Affinity Gel (Sigma, A2220) or BAG3 primary antibody o/n at 4°C. Immunoprecipitation  
183 experiments were performed 3 independent times.

184 *Cell Lines and Culture.* Murine C2C12 and C3H-10T1/2 cell lines were purchased from ATCC  
185 and cultured as per the manufacturer's recommendations. Differentiation was stimulated by  
186 serum withdrawal in differentiation medium (DM: DMEM supplemented with 2% horse serum,  
187 1% penicillin/streptomycin, 0.2% amphotericin B, and 0.01% human  
188 insulin/transferrin/selenium). To evaluate the effects of ischemia/hypoxia in skeletal muscle cells  
189 *in vitro*, we have established a model of cellular hypoxia in which cells are subjected to 0% O<sub>2</sub>  
190 and deprived of nutrients in Hanks' balanced salt solution (HBSS)<sup>9</sup> to mimic the local  
191 environment resulting from severe ischemia in PAD (referred to hereafter as hypoxia+nutrient  
192 deprivation, HND). GP2-293 cells for pantropic retrovirus generation were cultured at 37°C and  
193 5% CO<sub>2</sub> in DMEM with 10% FBS. Transfections were done with Lipofectamine-Plus reagent  
194 (Invitrogen).

195 *Primary Myoblast Isolation and Culture.* Primary murine muscle precursor cells (mouse  
196 myoblasts) derived from hindlimb muscles were prepared as previously described <sup>5</sup>. Briefly,  
197 peripheral skeletal muscle was dissected from 6-week old female mice using sterile technique,  
198 trimmed of connective tissue, and placed in 10-cm dishes containing ice cold sterile PBS.  
199 Organs were then transferred to separate 10-cm dishes containing 5mL of pre-warmed MPC  
200 isolation medium (IM: DMEM with 4.5g/L glucose, supplemented with 1%  
201 Penicillin/Streptomycin/Amphotericin B) and any remaining connective tissue was trimmed.  
202 Organs were then transferred to a third 10-cm dish containing 5mL of cold MPC IM, transported  
203 to the sterile culture hood, and minced for 2 minutes (per plate) using sterile razor blades. The  
204 minced slurry was transferred to 15mL tubes, 5mL additional MPC IM was added, tubes were  
205 inverted several times and centrifuged at 4°C for 3min at 700  $\times g$  to remove contaminants. The  
206 MPC IM was subsequently aspirated and the pellet was resuspended in 10mL of MPC IM and  
207 inverted 5-10 $\times$  to loosen the pellet and mix before decanting into a 10-cm culture dish. Tubes  
208 were subsequently rinsed with 8mL MPC IM to ensure all tissue was removed, and 2mL of 1%  
209 pronase (Calbiochem #53702) was added to a final concentration of 0.1%. A sterile, low-profile  
210 magnetic stir bar was added, and dishes were stirred at low rpm on a magnetic stir plate at 37°C  
211 and 5% CO<sub>2</sub> for 1hr. The digested tissue slurry was then transferred to 50mL conical tubes and  
212 centrifuged for 4min at 800  $\times g$  at RT. The supernatant was aspirated and the digested pellet  
213 was resuspended in 10mL MPC purification medium (PM: DMEM with 4.5g/L glucose,  
214 supplemented with 10% fetal bovine serum and 1% Penicillin/Streptomycin/Amphotericin B).  
215 The suspension was then triturated approximately 20 $\times$  through a blunt end pipetting needle  
216 attached to a sterile 30cc syringe. The suspension was then passed through a 100  $\mu$  m  
217 disposable Steriflip vacuum filter into a 50mL tube, including 3 successive 8mL washes of the  
218 sieve with pre-warmed PM, and subsequently centrifuged at RT 5min at 1000  $\times g$ . The cell pellet

219 was then resuspended in 1mL FBS before addition to primary MPC growth medium (GM: Ham's  
220 F10, supplemented with 20% FBS and 1% Penicillin/Streptomycin/Amphotericin B, and  
221 supplemented immediately prior to use with 5ng/mL basic FGF). Cells were plated on collagen-  
222 coated T150 flasks, allowed to adhere and proliferate for 3-days, and subsequently trypsinized  
223 with 0.25% Trypsin/EDTA and pre-plated at 37°C and 5% CO<sub>2</sub> for 1hr on an uncoated T150  
224 flask to allow for fibroblast removal. The supernatant containing the MPCs was removed and  
225 centrifuged at 800 ×g for 5min at RT prior to re-plating in MPC GM on collagen-coated T150  
226 flasks. After reaching approximately 70% confluence, MPCs were then plated in pre-warmed  
227 GM in either T75 flasks or standard 12-well culture plates coated with entactin/collagen/laminin  
228 and allowed to reach approximately 90% confluence. Confluent MPCs were then rinsed once in  
229 sterile PBS and switched to DM for myotube formation. DM was changed every 24 hours. Cell  
230 purity of myoblasts was verified by immunofluorescence staining for MyoD and DAPI followed  
231 by counting the number of MyoD-stained cells as a percentage of total nuclei. Purity of  
232 myotubes was also analyzed by immunofluorescence staining of myosin heavy chain (MyHC)  
233 and DAPI after differentiation into myotubes.

234 *Proliferation, apoptosis, and myotube fusion index assays.* Muscle myoblast cell proliferation  
235 was assessed by plating approximately 50,000 strain-specific and/or pre-infected (GFP,  
236 BAG3<sup>Met81</sup>, or BAG3<sup>lle81</sup> AAVs: 1×10<sup>9</sup> AVP) cells on 6-well plates coated with  
237 entactin/collagen/laminin (ECL). Wells were washed with phosphate-buffered saline (PBS),  
238 fixed with 100% methanol for 5 min, and left to air dry for 10 min. All experimental wells were  
239 then simultaneously stained with hematoxylin for 5-minutes and rinsed 3× in dH<sub>2</sub>O. Cell images  
240 were obtained via phase contrast at ×10 magnification on an inverted microscope camera  
241 system. Total image cell counts were quantified from at least 4 random fields, a number chosen  
242 by determination of no additional change in standard deviation, by a blinded investigator. Muscle

243 proliferation numbers were then normalized by treatment to the 0-hour (post-plating) counts to  
244 give fold population doubling values. Cellular apoptosis/necrosis was quantified using ApoAlert  
245 Annexin V kit (Clontech). Cells were stained with Annexin V-FITC, propidium iodide and DAPI  
246 and assessed under standard fluorescent microscopy. Immunofluorescence for myosin heavy  
247 chain (MyHC) and nuclei (DAPI) was performed for myotube fusion analysis as previously  
248 described<sup>10</sup>. Approximately 100,000 cells per treatment/strain were plated on 12-well plates  
249 coated with ECL, allowed to reach 50-60% confluence in primary GM, and infected with either  
250 control (GFP), BAG3<sup>Met81</sup>, or BAG3<sup>Ile81</sup> AAVs ( $2 \times 10^9$  AVP) for 24hrs in DM. DM was then  
251 changed every 24hours. Cells were washed with phosphate-buffered saline (PBS), fixed with  
252 100% methanol for 5 min, left to air dry for 10 min, and immunofluorescently labeled with anti-  
253 MyHC. Images were captured using a Life Technologies EVOS auto FL wide field fluorescence  
254 microscope (Thermo Fisher) and analyzed by a blinded investigator using ImageJ (NIH, v1.49).  
255 Each well was photographed in four randomly selected regions. The number of myonuclei and  
256 the total number of nuclei were scored and the fusion index was calculated as the percentage of  
257 total nuclei incorporated in myotubes. Each experiment included at least 3 technical replicates  
258 and each biological experiment was replicated at least 3 times.

259 *Virus Generation.* Pantropic BAG3 shRNA or GFP control retroviruses were generated by  
260 cotransfection of GP2-293 cells with shRNA plasmids (SABiosciences) and envelope plasmid  
261 (VSVG). BAG3 shRNA (sequence derived from TRCN0000293298, Sigma-Aldrich) or  
262 scrambled (scr) Control (Sigma-Aldrich) annealed oligos were also ligated into pLKO.1-TRC  
263 cloning vector (Addgene, plasmid #10878). The full pLKO.1 shRNA cassette was cloned via In-  
264 Fusion (Clontech) into pAdeno-X PRLS Universal System 3 vector (Clontech). The insert,  
265 mRFP:EGFP:LC3 from plasmid ptfLC3 (Addgene #21074), was cloned via In-Fusion (Clontech)  
266 into the Adeno-X adenoviral vector (Clontech). Adenoviruses were generated by transfection of  
267 Adeno-X 293 cells using CalPhos Mammalian Transfection Kit (Clontech). pCMV5 containing

268 C-terminal FLAG-tagged coding regions of either BALB/c (Met81) or BL6 (Ile81)-specific mouse  
269 *Bag3* were moved into pTR-transgene AAV vectors in combination with XX680 for virus  
270 generation. Adeno-associated viruses (GFP, BAG3<sup>Met81</sup>, BAG3<sup>Ile81</sup>) were generated using mouse  
271 strain-specific constructs in suspension HEK293 cells and purified by column chromatography  
272 at the UNC Viral Vector Core Facility. AAV viruses were injected *in vivo* either 1) IM into the TA  
273 and medial and lateral gastrocnemius hindlimb muscles ( $1 \times 10^{10}$  AVP/injection site) and allowed  
274 to express for 7 days prior to HLI; or 2) systemically (retro-orbitally;  $1 \times 10^{11}$  AVP/ injection) and  
275 allowed to express for 21 days prior to HLI, or they were used *in vitro* ( $1 \times 10^9$  AVP). All  
276 intramuscular or systemic (retro-orbital) virus-injected animals (regardless of heterogeneity or  
277 lack of expression) were included for analysis.

278 *Autophagic Flux.* Autophagic flux was assessed in myoblasts and myotubes using an  
279 adenovirus expressing the RFP-GFP-LC3 reporter<sup>31</sup>. Sub-confluent myoblasts in a 12-well plate  
280 were infected with RFP-GFP-LC3 and BAG3 viruses for 8 hours in low serum medium and  
281 subjected to control or experimental ischemia conditions approximately 48-hours later.  
282 Confluent primary BALB/c myoblasts in a 12-well plate were also infected with RFP-GFP-LC3  
283 and BAG3 viruses overnight at the time of transition to low serum differentiation medium and  
284 then allowed to differentiate for 120hrs. Images were captured using a Life Technologies Evos  
285 auto FL wide field fluorescence microscope (Thermo Fisher) and analyzed by a blinded  
286 investigator. Punctate structures with GFP-RFP and/or RFP signals were quantified in more  
287 than 120 cells per group, and the degree of autophagosome maturation was expressed as the  
288 percent of puncta with red color, as previously described<sup>32</sup>.

289 *Statistical Analysis.* Statistical analyses were carried out using StatPlus:mac (v. 2009) statistical  
290 analysis software, Vassarstats ([www.vassarstats.net](http://www.vassarstats.net)), or Prism 6 (v. 6.0d). Non-parametric  
291 necrosis score and peak specific force (% Control) data were compared using Kruskal-Wallis

292 tests and Mann-Whitney U Tests, where appropriate, for post-hoc analyses. For MR  
293 angiography analyses, data were evaluated using Student's *t*-test. Correlation data for BAG3  
294 protein and muscle force production were performed using least squares regression procedure.  
295 Data corrected for control limbs were analyzed using paired *t*-tests. All other data were  
296 compared using ANOVA or repeated measures ANOVA with Tukey's post hoc tests or Student's  
297 2-tailed *t*-test. In all cases,  $P < 0.05$  was considered statistically significant and values are  
298 presented as means  $\pm$  SE.

299

300

301 **Supplemental References**

- 302 1. Keum S, Lee HK, Chu PL, Kan MJ, Huang MN, Gallione CJ, Gunn MD, Lo DC  
303 and Marchuk DA. Natural genetic variation of integrin alpha L (Itgal) modulates ischemic  
304 brain injury in stroke. *PLoS Genet.* 2013;9:e1003807.
- 305 2. Dokun AO, Keum S, Hazarika S, Li Y, Lamonte GM, Wheeler F, Marchuk DA and  
306 Annex BH. A quantitative trait locus (LSq-1) on mouse chromosome 7 is linked to the  
307 absence of tissue loss after surgical hindlimb ischemia. *Circulation.* 2008;117:1207-15.
- 308 3. McClung JM, McCord TJ, Southerland K, Schmidt CA, Padgett ME, Ryan TE and  
309 Kontos CD. Subacute limb ischemia induces skeletal muscle injury in genetically  
310 susceptible mice independent of vascular density. *J Vasc Surg.* 2016;64(4):1101-  
311 1111.e2.
- 312 4. Yan Z, Choi S, Liu X, Zhang M, Schageman JJ, Lee SY, Hart R, Lin L, Thurmond  
313 FA and Williams RS. Highly coordinated gene regulation in mouse skeletal muscle  
314 regeneration. *J Biol Chem.* 2003;278:8826-36.
- 315 5. McClung JM, McCord TJ, Keum S, Johnson S, Annex BH, Marchuk DA and  
316 Kontos CD. Skeletal muscle-specific genetic determinants contribute to the differential  
317 strain-dependent effects of hindlimb ischemia in mice. *The American journal of*  
318 *pathology.* 2012;180:2156-69.
- 319 6. Spangenburg EE, Le Roith D, Ward CW and Bodine SC. A functional insulin-like  
320 growth factor receptor is not necessary for load-induced skeletal muscle hypertrophy. *J*  
321 *Physiol.* 2008;586:283-91.
- 322 7. Brooks SV and Faulkner JA. Contractile properties of skeletal muscles from  
323 young, adult and aged mice. *J Physiol.* 1988;404:71-82.
- 324 8. McCarthy JJ, Mula J, Miyazaki M, Erfani R, Garrison K, Farooqui AB, Srikuea R,  
325 Lawson BA, Grimes B, Keller C, Van Zant G, Campbell KS, Esser KA, Dupont-  
326 Versteegden EE and Peterson CA. Effective fiber hypertrophy in satellite cell-depleted  
327 skeletal muscle. *Development.* 2011;138:3657-66.
- 328 9. Arany Z, Foo SY, Ma Y, Ruas JL, Bommi-Reddy A, Girnun G, Cooper M, Laznik  
329 D, Chinsomboon J, Rangwala SM, Baek KH, Rosenzweig A and Spiegelman BM. HIF-  
330 independent regulation of VEGF and angiogenesis by the transcriptional coactivator  
331 PGC-1alpha. *Nature.* 2008;451:1008-12.
- 332 10. McClung JM, Reinardy JL, Mueller SB, McCord TJ, Kontos CD, Brown DA,  
333 Hussain SN, Schmidt CA, Ryan TE and Green TD. Muscle cell derived angiotensin-1  
334 contributes to both myogenesis and angiogenesis in the ischemic environment.  
335 *Frontiers in physiology.* 2015;6:161.
- 336

337

338 **Supplemental Figure 1**

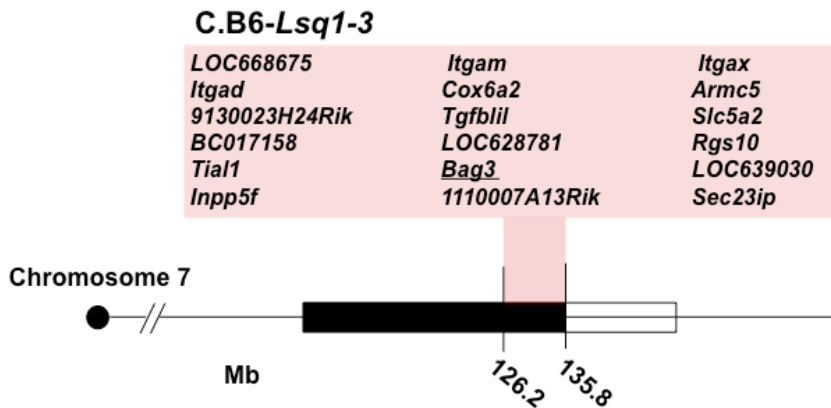

339

340 **Congenic mice narrowing *Lsq-1*.** BALB/c-Chr7-C57BL/6J chromosome substitution congenic  
 341 strain (Congenic, C.B6-*Lsq1-3*) was generated in which a 12 MB region of Chr 7 (containing  
 342 *Bag3*, among other *Lsq-1* genes), was introgressed from BL6 into the BALB/c background.

343

344

345

346

347

348

349

350

351

352

353

354

355

356



357 **Supplemental Figure 2**

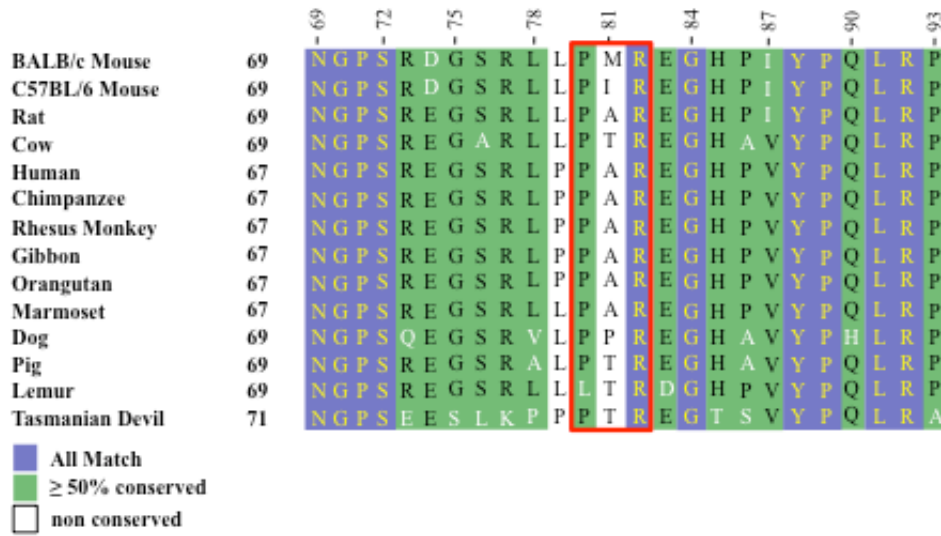

358

359 **SFigure 2. BAG3 protein variation around amino acid residue 81.** Alignment of BAG3

360 protein sequences from various species reveals a lack of conservation at amino acid residue 81

361 but a high degree of conservation among surrounding residues.

362

363

364 **Supplemental Figure 3**

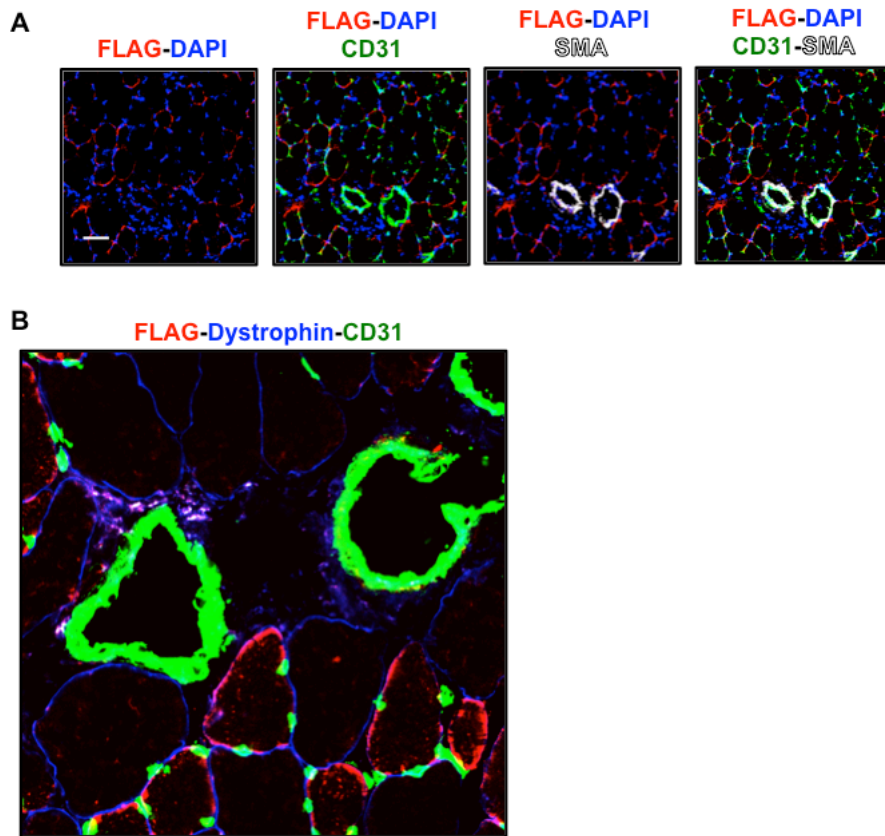

365

366 **SFigure 3. Localization of AAV6-expressed FLAG-tagged BAG3.** To verify the efficiency of  
367 expression of AAV6-BAG3,  $2 \times 10^{10}$  active viral particles (AVP) were injected into the TA muscle  
368 of non-ischemic mice. **A,B.** Muscle sections ( $8 \mu\text{m}$ ) were immunofluorescently stained with  
369 anti-FLAG (red) and anti-CD31 (green) and co-labeled with antibodies against smooth muscle  
370 actin (SMA, white, A) or dystrophin (blue, B), and co-labeled with DAPI to stain nuclei (A) to  
371 verify efficiency of muscle tissue transgene expression.

372

373

374 **Supplemental Figure 4**

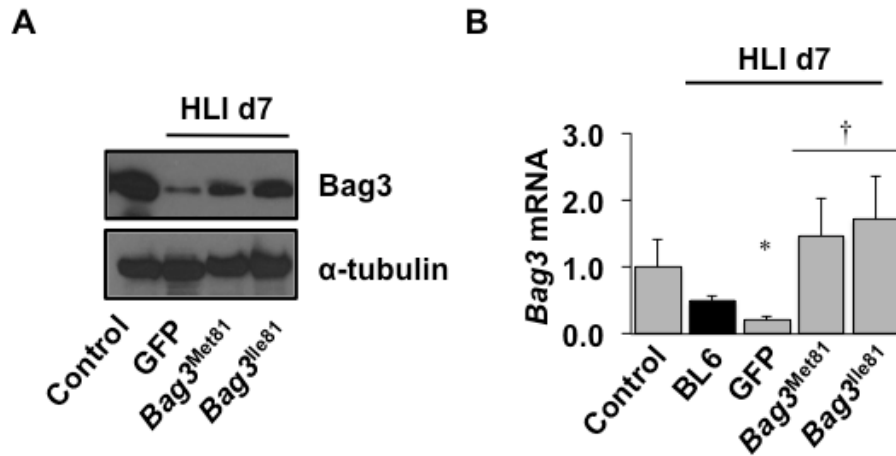

375

376 **SFigure 4. Verification of BAG3 expression in ischemic limb muscle.** BL6 and BALB/c  
377 mice were infected with serotype 6 adeno-associated viruses encoding GFP, BAG3<sup>Met81</sup>, or  
378 BAG3<sup>Ile81</sup>. Seven days later, mice were subjected to HLI, and another 7 days later tissue was  
379 harvested for analysis of BAG3 mRNA and protein expression. **A.** BALB/c skeletal muscle  
380 homogenates were western blotted for BAG3 protein expression and  $\alpha$ -tubulin as a loading  
381 control, and non-ischemic muscle was used as a Control. **B.** Muscle from control, non-ischemic  
382 hind limb or from ischemic BL6 mice (black bar) or ischemic BALB/c mice injected with AAVs  
383 encoding the indicated proteins (gray bars) was used for qRT-PCR analysis. \* $P$ <0.05 vs. non-  
384 ischemic control (Control); † $P$ <0.05 vs. GFP.

385

386 **Supplemental Figure 5**

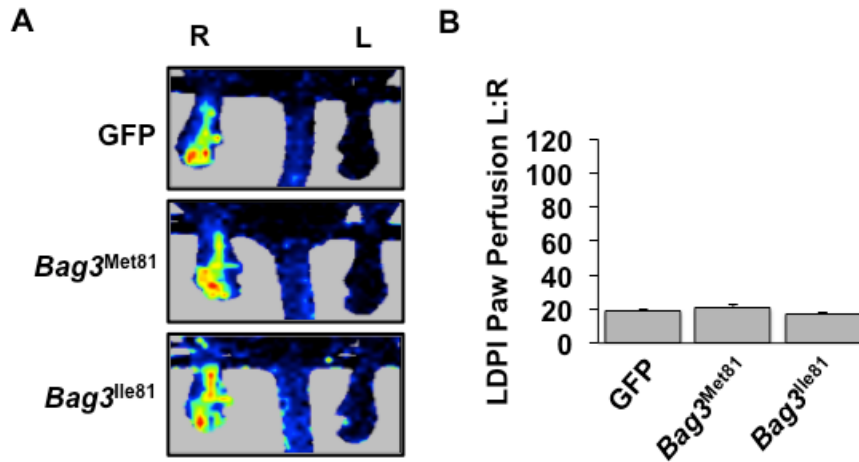

387

388 **SFigure 5. AAV-infected mice display similar perfusion deficits immediately post**  
389 **ischemia surgery.** BALB/c were infected with adeno-associated viruses encoding GFP,  
390 *BAG3<sup>Met81</sup>*, or *BAG3<sup>lle81</sup>* and 7 days later were subjected to HLI. Limb blood flow was analyzed  
391 by LDPI immediately post-surgery (A) and quantified as a percentage of perfusion in the non-  
392 injected limb (B).

393

394

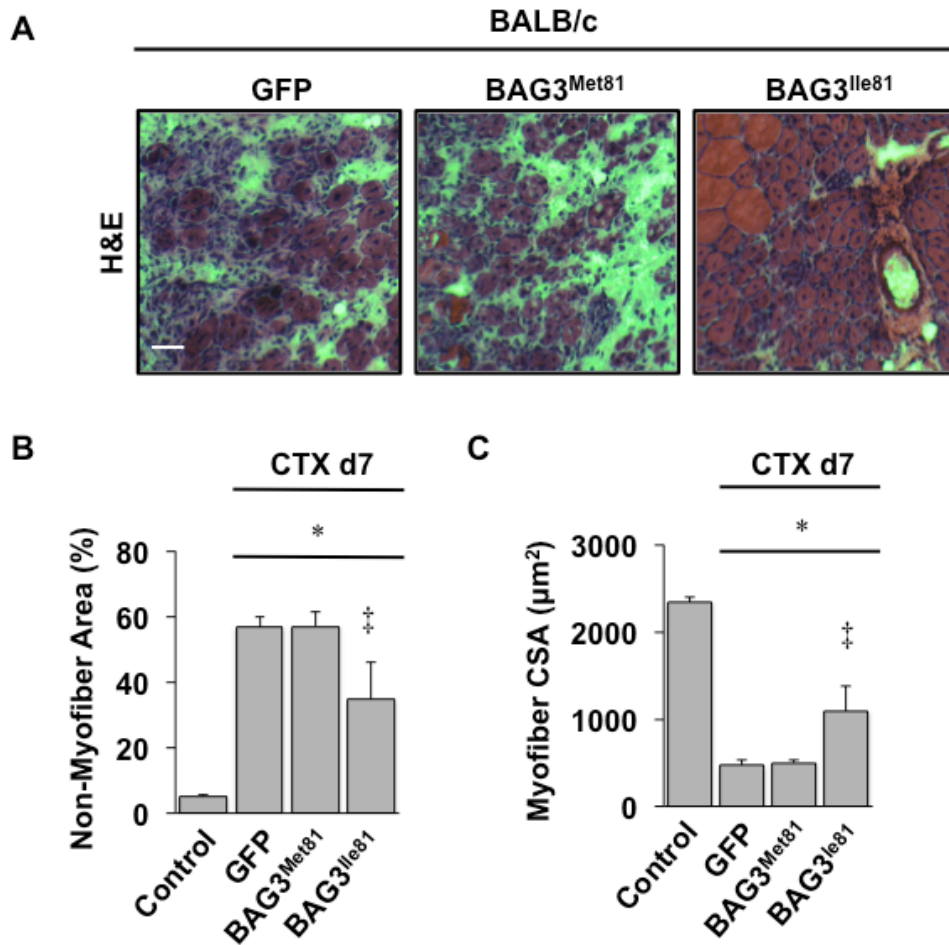

396

397 **SFigure 6. BAG3<sup>Ile81</sup> enhances non-ischemic muscle regeneration.** Cardiotoxin (CTX, *Naja*

398 *nigricolis* toxin) injection, a traditional muscle regeneration model, was performed in BALB/c

399 mice injected IM with AAVs encoding GFP, BAG3<sup>Met81</sup>, or BAG3<sup>Ile81</sup> (N $\geq$ 5 mice/group). The TA

400 muscle was visualized histologically after H&E staining (**A**, scale bar = 100  $\mu$  m), and non-

401 myofiber tissue area (**B**) and myofiber cross sectional area (**C**) were quantified. Note the

402 preservation of myofiber fascicular architecture and size with BAG3<sup>Ile81</sup> expression. \**P*<0.05 vs.

403 Control. ‡ *P*<0.05 vs. GFP or BAG3<sup>Met81</sup>. All data are means  $\pm$  SEM.

404

405 **Supplemental Figure 7**

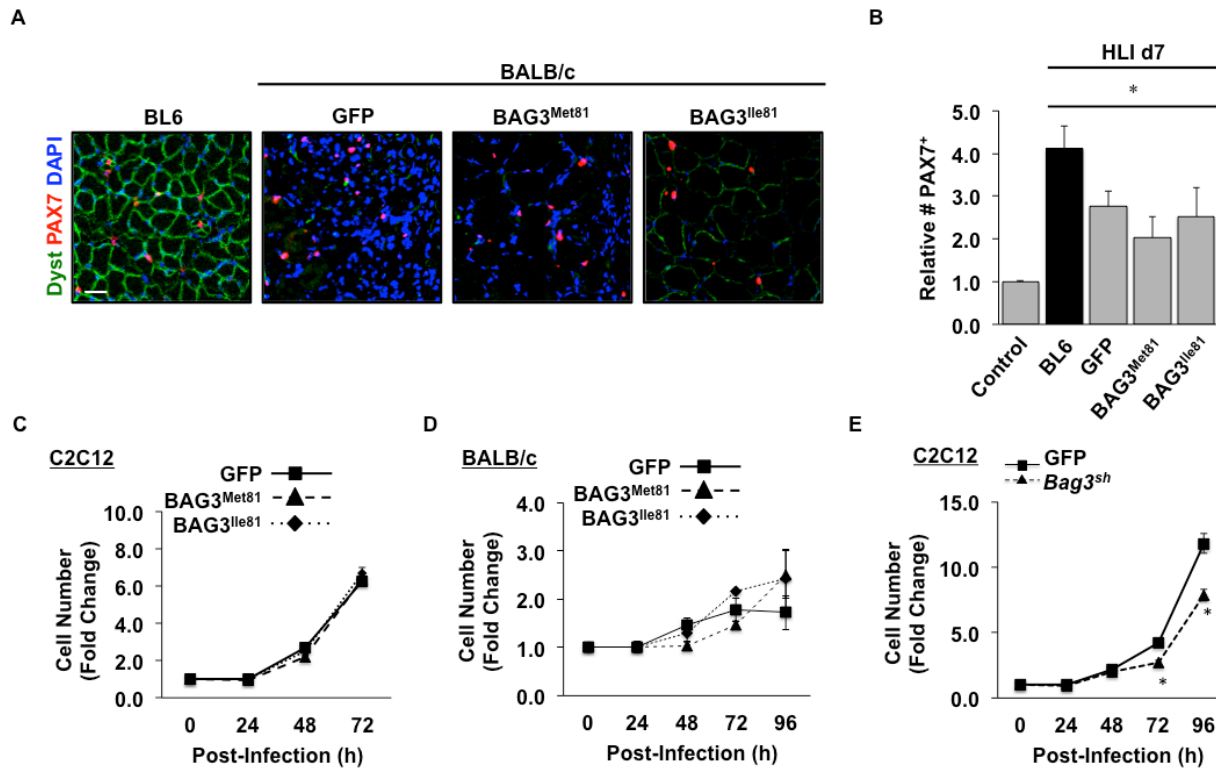

406

407 **SFigure 7. BAG3 overexpression does not alter myoblast proliferation.** A-B. BL6 and  
 408 BALB/c mice were injected IM with the indicated AAVs then subjected to HLI for 7-days (N≥5  
 409 mice/group). TA muscle sections were stained with antibodies against the myogenic precursor  
 410 cell marker PAX7 and dystrophin (Dyst, pseudocolored green) (A), and the density of PAX7<sup>+</sup>  
 411 nuclei was quantified (B). \* P<0.05 vs. Control. C-D. C2C12 myoblasts (C) or primary myoblasts  
 412 isolated from BALB/c mice (D) were infected *in vitro* with Adenoviruses encoding GFP,  
 413 BAG3<sup>Met81</sup>, or BAG3<sup>Ile81</sup> and cell numbers were assessed at the indicated times as an indicator  
 414 of proliferation (N ≥ 3). E. Viral knockdown of BAG3 (Bag3<sup>sh</sup>, N ≥ 3) decreases cell  
 415 number/proliferation in C2C12 cells *in vitro*. \*P<0.05 vs. GFP control. All data are means ± SEM.

416

417

418

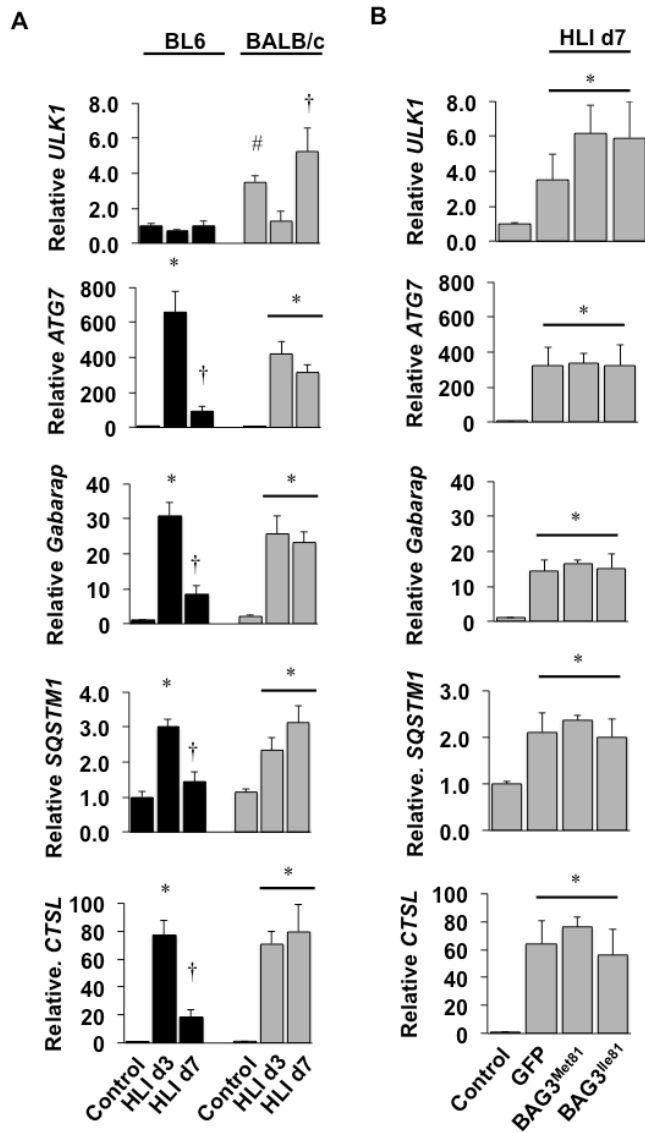

420

421 **SFigure 8. Strain dependence of autophagy-related transcripts during limb ischemia. A.**

422 BL6 and BALB/c mice were subjected to HLI for 3 and 7 days, and RNA was isolated from limb

423 muscle tissue for the quantification of the autophagy-related mRNAs ULK1, ATG7, Gabarap,

424 SQSTM1, and CTSL by qRT-PCR, corrected for GAPDH, and normalized to expression in the

425 contralateral control limb. \* $P < 0.05$  vs. strain-matched Control; † $P < 0.05$  vs. strain-matched HLI

426 d3. #  $P < 0.05$  vs. BL6 Control (*a priori* analysis). **B.** BALB/c mice (gray bars) injected IV with

427 AAVs encoding GFP (N=5), BAG3<sup>Met81</sup> (N=10), or BAG3<sup>Ile81</sup> (N=9) were subjected to modified  
428 HLI with collateral vessels left intact. RNA was isolated from limb muscle tissue for the  
429 quantification of autophagy-related mRNAs (ULK1, ATG7, Gabarap, SQSTM1, and CTSL) by  
430 qRT-PCR, corrected for GAPDH and normalized to expression in the contralateral control limb.  
431 \**P*<0.05 vs. Control; †*P*<0.05 vs. HLI d7. All data are means ± SEM.

432

433

434

435

436

437

438

439

440

441

442

443

444

445

446

447

448

449

450

451



452 **Supplemental Figure 9**

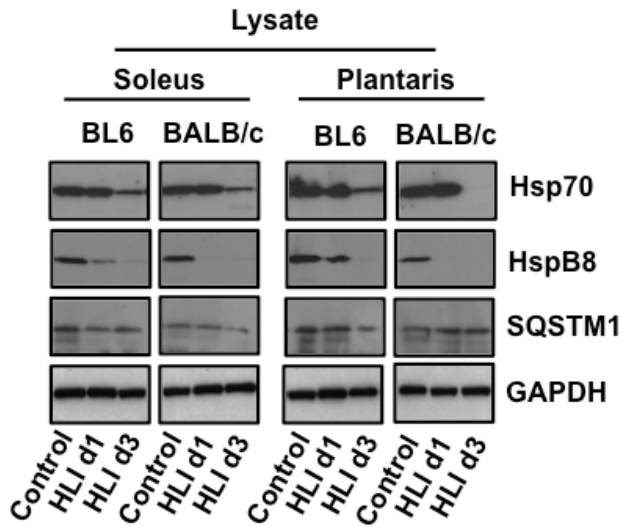

453

454 **SFigure 9. Differential expression of BAG3 protein interactors during HLI in BL6 and**

455 **BALB/c limb muscle.** BL6 and BALB/c mice were subjected to HLI for 1 and 3 days, and

456 protein was isolated from the soleus and plantaris limb muscles for western blotting. GAPDH

457 was used as a loading control.

458

459

460

461

462

463

464

465

466

467

468

469 **Supplemental Figure 10**

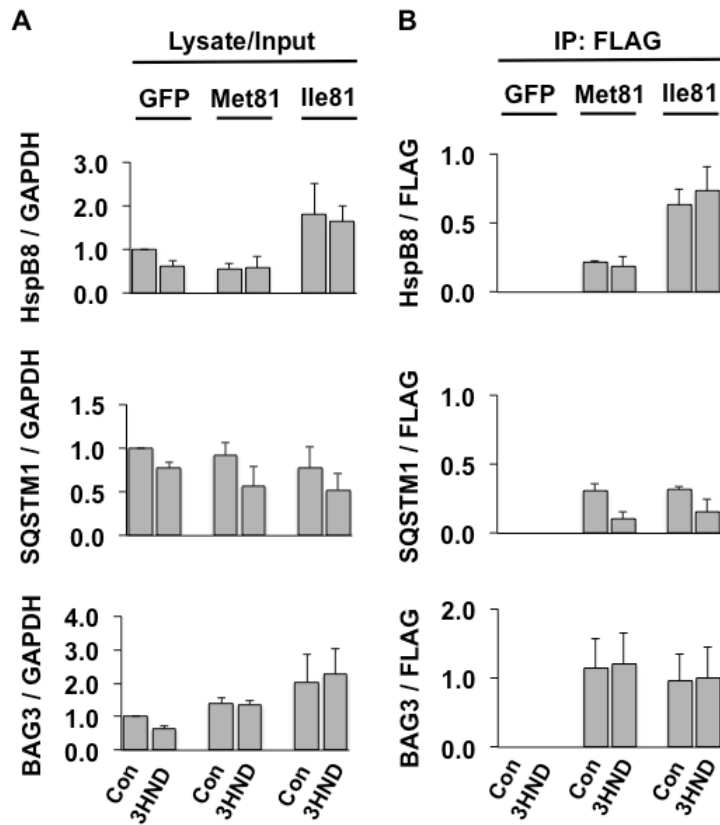

470

471 **SFigure 10. BALB/c myotube protein abundances during ischemia.** **A.** BALB/c primary  
 472 muscle cells were infected with viruses encoding GFP, BAG3<sup>Met81</sup>, or BAG3<sup>Ile81</sup> and allowed to  
 473 differentiate for 96h before experimental ischemia (3HND). Whole cell lysates were  
 474 immunoblotted for HspB8, SQSTM1 (p62), and BAG3. Input/Lysate culture experiments were  
 475 performed 3 independent times and protein abundances are graphically presented as corrected  
 476 for GAPDH and normalized to GFP Control values for each independent experiment. **B.** FLAG-  
 477 BAG3 was immunoprecipitated from input cell lysates (**A**) to examine the expression of BAG3  
 478 protein and the association of HspB8 and SQSTM1 with exogenously expressed BAG3.  
 479 Immunoprecipitations were performed in 3 independent experiments and protein abundances  
 480 are graphically presented as corrected for FLAG for each independent experiment.
